# Supplementary material for: Carbon and nitrogen stocks in particle-size fractions of topsoil along a 3000 km aridity gradient in northern China
Source: Copernicus journal article supplement (doi:10.5194/bg-2015-651), 2016-01-18
Supplement: Supplementary file [file bg-2015-651-AC1-supplement.pdf]

Table legend

**Table 1** Soil C and N concentrations in bulk soils and different soil particle-size fractions (sand, silt and clay) at 58 sampling sites in arid and semi-arid grasslands of northern China (Data are represented as means  $\pm$  1 SE, n=5)

**Table 2** Soil C and N stocks in bulk soils and different soil particle-size fractions (sand, silt and clay) at 58 sampling sites in arid and semi-arid grasslands of northern China (Data are represented as means  $\pm$  1 SE, n=5)

Table 1

| site         |               | C concentrations (g C kg <sup>-1</sup> ) |            |            |            | N concentrations (g N kg <sup>-1</sup> ) |           |           |           |
|--------------|---------------|------------------------------------------|------------|------------|------------|------------------------------------------|-----------|-----------|-----------|
| latitude     | longitude     | bulk soil                                | sand       | silt       | clay       | bulk soil                                | sand      | silt      | clay      |
| 42°13'24.02" | 87°22'37.83"  | 8.66±0.70                                | 3.28±0.37  | 28.71±1.62 | 36.52±6.17 | 0.32±0.05                                | 0.11±0.01 | 0.67±0.13 | 3.02±0.65 |
| 42°59'17.72" | 90°25'32.02"  | 9.69±0.49                                | 7.08±0.05  | 19.3±2.07  | 12.28±2.34 | 0.49±0.04                                | 0.33±0.02 | 0.45±0.03 | 0.78±0.10 |
| 43°16'04.17" | 91°15'35.87"  | 7.54±1.13                                | 4.71±0.34  | 21.90±1.13 | 17.13±2.05 | 0.81±0.48                                | 0.17±0.02 | 0.56±0.10 | 1.38±0.36 |
| 43°24'13.23" | 91°54'43.13"  | 8.35±1.01                                | 5.05±0.14  | 21.69±1.79 | 26.68±4.62 | 0.47±0.12                                | 0.20±0.02 | 0.80±0.16 | 2.43±0.52 |
| 43°07'38.09" | 92°48'45.88"  | 11.5±0.58                                | 6.19±0.34  | 33.21±1.13 | 44.71±3.31 | 0.58±0.09                                | 0.22±0.03 | 0.97±0.12 | 3.05±0.38 |
| 42°58'04.74" | 93°27'34.27"  | 6.14±0.46                                | 3.43±0.21  | 20.86±0.57 | 23.34±1.05 | 0.38±0.04                                | 0.25±0.04 | 0.99±0.08 | 2.10±0.12 |
| 42°41'55.57" | 93°58'53.51"  | 3.85±0.15                                | 1.75±0.09  | 18.21±1.92 | 19.11±2.39 | 0.36±0.15                                | 0.15±0.03 | 0.65±0.21 | 1.45±0.36 |
| 42°15'37.46" | 94°16'44.10"  | 12.97±2.27                               | 10.03±1.46 | 30.65±5.63 | 8.96±0.65  | 0.14±0.01                                | 0.17±0.01 | 0.28±0.02 | 0.73±0.08 |
| 41°34'12.85" | 95°17'50.04"  | 9.78±0.80                                | 5.62±0.68  | 24.42±0.69 | 18.45±1.34 | 0.33±0.02                                | 0.19±0.02 | 0.55±0.04 | 1.39±0.16 |
| 39°51'53.47" | 98°39'20.30"  | 13.71±0.82                               | 11.94±0.80 | 29.24±4.11 | 13.38±1.24 | 0.28±0.01                                | 0.14±0.03 | 0.49±0.03 | 0.88±0.07 |
| 40°14'41.91" | 99°20'35.82"  | 14.38±0.75                               | 14.25±0.78 | 21.10±0.50 | 16.44±2.13 | 0.20±0.03                                | 0.19±0.02 | 0.55±0.01 | 1.01±0.05 |
| 40°28'46.39" | 99°51'59.92"  | 7.73±0.18                                | 6.48±0.23  | 26.67±1.71 | 8.36±0.40  | 0.26±0.01                                | 0.16±0.03 | 0.42±0.03 | 0.87±0.06 |
| 41°08'18.31" | 100°27'38.72" | 8.10±0.52                                | 5.13±0.18  | 21.76±1.54 | 15.72±2.09 | 0.36±0.05                                | 0.17±0.02 | 0.46±0.04 | 1.25±0.19 |
| 41°39'47.22" | 100°58'30.60" | 8.83±0.34                                | 6.80±0.21  | 22.43±0.56 | 10.93±1.20 | 0.32±0.02                                | 0.18±0.01 | 0.41±0.06 | 0.66±0.04 |
| 42°00'49.37" | 101°42'23.12" | 6.48±0.27                                | 6.40±0.26  | 10.01±0.74 | 6.01±0.29  | 0.20±0.02                                | 0.19±0.03 | 0.47±0.05 | 0.75±0.06 |
| 41°57'49.08" | 102°20'41.89" | 3.95±0.22                                | 2.55±0.13  | 22.12±1.11 | 9.64±1.40  | 0.19±0.03                                | 0.19±0.01 | 0.45±0.04 | 0.91±0.06 |
| 41°43'02.80" | 103°06'51.38" | 9.19±0.24                                | 6.99±0.40  | 21.62±1.17 | 11.04±0.98 | 0.35±0.04                                | 0.23±0.02 | 0.53±0.03 | 0.74±0.02 |
| 41°21'26.33" | 103°45'42.79" | 4.20±0.23                                | 3.25±0.17  | 17.01±0.55 | 5.60±0.42  | 0.18±0.01                                | 0.19±0.01 | 0.47±0.05 | 0.63±0.06 |
| 40°52'33.64" | 104°26'49.14" | 9.01±0.52                                | 4.29±0.35  | 22.52±1.58 | 22.91±0.97 | 0.31±0.03                                | 0.16±0.02 | 0.68±0.04 | 1.50±0.13 |
| 40°47'37.30" | 104°52'51.45" | 5.32±0.95                                | 1.77±0.11  | 19.27±2.01 | 21.95±2.22 | 0.23±0.03                                | 0.16±0.02 | 0.53±0.07 | 1.13±0.14 |
| 40°43'44.48" | 105°36'43.8"  | 4.48±0.54                                | 2.60±0.43  | 14.61±0.64 | 14.71±0.88 | 0.22±0.03                                | 0.21±0.03 | 0.67±0.03 | 1.64±0.08 |

---

|              |               |            |            |            |            |           |           |           |           |
|--------------|---------------|------------|------------|------------|------------|-----------|-----------|-----------|-----------|
| 40°41'025"   | 106°02'886"   | 5.97±1.06  | 1.71±0.12  | 17.42±1.42 | 27.64±0.92 | 0.35±0.06 | 0.18±0.03 | 0.88±0.08 | 1.91±0.14 |
| 41°27'02.23" | 107°00'06.04" | 12.70±2.16 | 1.31±0.27  | 21.08±2.68 | 37.47±2.47 | 0.76±0.08 | 0.19±0.01 | 1.31±0.08 | 2.31±0.09 |
| 41°47'46.44" | 107°28'11.62" | 6.36±0.30  | 0.81±0.14  | 11.71±0.69 | 24.14±1.47 | 0.58±0.02 | 0.19±0.02 | 1.11±0.08 | 2.23±0.04 |
| 41°49'42.97" | 107°36'40.26" | 6.3±0.40   | 0.64±0.04  | 13.84±0.81 | 31.14±1.32 | 0.64±0.05 | 0.16±0.02 | 1.54±0.13 | 3.46±0.18 |
| 41°51'57.84" | 108°03'14.43" | 4.85±0.21  | 1.01±0.08  | 11.26±2.86 | 20.26±0.80 | 0.48±0.04 | 0.19±0.03 | 1.06±0.27 | 2.69±0.06 |
| 41°54'52.38" | 108°42'38.69" | 6.75±0.38  | 1.01±0.03  | 14.41±0.77 | 29.94±0.95 | 0.80±0.06 | 0.19±0.02 | 1.84±0.10 | 4.20±0.07 |
| 42°09'46.07" | 109°09'56.15" | 5.80±0.29  | 0.84±0.06  | 16.83±0.78 | 26.45±0.61 | 0.64±0.05 | 0.15±0.02 | 1.80±0.07 | 3.23±0.06 |
| 42°24'54.72" | 109°48'18.06" | 4.39±0.27  | 0.56±0.02  | 9.37±0.31  | 12.12±0.34 | 0.71±0.05 | 0.22±0.03 | 1.40±0.05 | 2.31±0.04 |
| 42°37'26.24" | 110°17'41.72" | 4.17±0.33  | 0.72±0.02  | 11.35±1.11 | 13.26±0.46 | 0.54±0.03 | 0.24±0.02 | 1.29±0.08 | 2.05±0.08 |
| 42°55'54.74" | 110°49'27.19" | 2.93±0.10  | 0.42±0.03  | 10.82±0.61 | 14.99±0.30 | 0.46±0.04 | 0.19±0.03 | 1.58±0.09 | 2.64±0.06 |
| 43°08'49.69" | 111°21'18.26" | 5.18±0.55  | 0.66±0.06  | 12.60±0.77 | 15.71±0.73 | 0.60±0.05 | 0.18±0.01 | 1.65±0.06 | 2.41±0.06 |
| 43°22'54.51" | 111°57'51.32" | 9.54±0.21  | 1.09±0.05  | 25.12±0.68 | 19.64±0.71 | 0.71±0.02 | 0.18±0.01 | 1.83±0.03 | 1.79±0.04 |
| 43°38'05.12" | 112°11'47.03" | 2.71±0.25  | 0.46±0.05  | 10.26±1.22 | 22.59±0.40 | 0.36±0.04 | 0.15±0.02 | 1.41±0.11 | 3.39±0.04 |
| 43°42'25.70" | 112°55'16.72" | 6.08±0.69  | 0.54±0.04  | 17.40±1.79 | 23.09±2.45 | 0.70±0.01 | 0.16±0.01 | 1.99±0.05 | 2.94±0.08 |
| 43°49'08.29" | 113°27'58.82" | 4.14±0.32  | 0.75±0.05  | 15.89±0.88 | 23.87±0.39 | 0.49±0.04 | 0.15±0.02 | 1.98±0.06 | 3.68±0.04 |
| 43°50'58.62" | 114°05'08.22" | 6.12±0.26  | 0.87±0.07  | 17.61±1.35 | 27.75±0.64 | 0.85±0.03 | 0.19±0.01 | 2.29±0.17 | 4.24±0.05 |
| 43°58'46.01" | 114°49'36.29" | 9.63±1.51  | 1.10±0.27  | 23.57±2.37 | 37.96±3.76 | 1.17±0.07 | 0.17±0.03 | 2.76±0.24 | 4.99±0.06 |
| 43°55'33.55" | 115°42'06.75" | 9.83±0.74  | 1.07±0.12  | 27.50±1.47 | 37.53±1.10 | 1.29±0.09 | 0.20±0.01 | 3.37±0.16 | 5.26±0.12 |
| 44°13'17.46" | 116°30'25.43" | 11.47±0.16 | 1.02±0.09  | 29.23±1.47 | 46.78±0.48 | 1.37±0.02 | 0.23±0.01 | 3.27±0.15 | 5.93±0.05 |
| 44°27'59.70" | 117°10'47.04" | 15.17±1.52 | 2.24±0.24  | 36.64±2.20 | 53.74±2.63 | 1.72±0.17 | 0.25±0.03 | 3.97±0.24 | 6.73±0.19 |
| 44°39'58.27" | 117°53'44.73" | 25.5±1.11  | 4.65±0.59  | 40.01±1.13 | 67.17±2.25 | 2.70±0.08 | 0.50±0.06 | 4.16±0.12 | 8.07±0.28 |
| 44°59'23.89" | 118°44'44.89" | 14.53±0.98 | 3.32±0.44  | 44.87±1.71 | 72.27±1.25 | 1.49±0.10 | 0.30±0.03 | 4.61±0.13 | 8.48±0.13 |
| 45°25'36.47" | 119°43'23.02" | 21.09±1.08 | 3.94±0.73  | 47.37±1.35 | 76.83±0.75 | 1.97±0.08 | 0.31±0.04 | 4.16±0.12 | 8.08±0.05 |
| 46°22'37.77" | 120°28'38.48" | 37.01±2.79 | 16.31±3.17 | 44.64±3.27 | 68.97±2.69 | 3.34±0.24 | 1.23±0.20 | 3.39±0.26 | 6.98±0.32 |
| 47°39'21.62" | 119°17'57.40" | 38.17±2.43 | 12.67±1.58 | 45.00±3.53 | 89.56±5.70 | 3.50±0.24 | 0.94±0.13 | 3.81±0.40 | 9.16±0.56 |

---

---

|              |               |            |            |            |             |           |           |           |            |
|--------------|---------------|------------|------------|------------|-------------|-----------|-----------|-----------|------------|
| 48°05'19.80" | 118°27'20.04" | 17.26±0.54 | 2.33±0.30  | 36.19±0.95 | 64.34±1.13  | 1.76±0.04 | 0.24±0.03 | 3.41±0.10 | 7.30±0.10  |
| 48°20'40.36" | 117°58'46.17" | 9.31±0.60  | 1.08±0.11  | 28.08±1.75 | 50.39±2.86  | 1.03±0.07 | 0.22±0.03 | 2.79±0.17 | 6.09±0.28  |
| 48°29'49.3"  | 117°09'716"   | 6.88±0.18  | 1.11±0.08  | 37.61±1.67 | 61.59±1.78  | 0.87±0.02 | 0.21±0.02 | 3.77±0.10 | 7.47±0.14  |
| 48°51'26.99" | 116°53'36.00" | 9.06±0.92  | 1.04±0.18  | 27.98±2.37 | 40.5±1.90   | 1.13±0.09 | 0.18±0.03 | 2.81±0.24 | 4.97±0.33  |
| 49°20'17.60" | 117°05'28.24" | 12.27±1.37 | 2.58±0.42  | 63.65±4.30 | 75.87±2.33  | 1.35±0.13 | 0.30±0.06 | 5.89±0.41 | 8.81±0.22  |
| 49°31'45.39" | 118°00'35.84" | 9.16±0.23  | 1.23±0.06  | 60.19±1.77 | 80.9±1.33   | 1.05±0.01 | 0.17±0.02 | 5.59±0.14 | 9.40±0.16  |
| 49°47'01.88" | 118°32'00.47" | 13.21±0.58 | 2.72±0.31  | 65.95±2.72 | 75.77±1.76  | 1.50±0.06 | 0.32±0.04 | 6.13±0.20 | 8.93±0.25  |
| 50°03'13.52" | 119°16'57.97" | 19.96±1.08 | 3.63±0.14  | 61.42±2.35 | 75.72±2.00  | 2.05±0.08 | 0.34±0.01 | 5.38±0.15 | 8.18±0.15  |
| 49°52'44.41" | 119°59'36.93" | 48.93±1.05 | 37.62±1.73 | 43.74±2.02 | 62.92±2.50  | 4.35±0.06 | 2.78±0.18 | 3.50±0.13 | 6.11±0.23  |
| 49°28'48.71" | 119°40'55.44" | 50.33±3.21 | 59.71±5.17 | 37.20±4.97 | 53.87±3.69  | 4.75±0.30 | 4.81±0.41 | 3.17±0.42 | 5.51±0.39  |
| 49°11'19.5"  | 120°21'45.1"  | 28.07±3.15 | 5.72±1.02  | 56.70±4.65 | 100.73±5.35 | 2.64±0.28 | 0.53±0.08 | 5.02±0.43 | 10.33±0.51 |
| 44°46'16.79" | 123°23'04.99" | 9.17±0.43  | 1.48±0.28  | 19.78±4.43 | 59.23±2.83  | 0.87±0.13 | 0.23±0.03 | 1.91±0.46 | 5.57±0.94  |

---

Table 2

| site         |               | C stocks (Mg C ha <sup>-1</sup> ) |            |           |           | N stocks (Mg N ha <sup>-1</sup> ) |           |           |           |
|--------------|---------------|-----------------------------------|------------|-----------|-----------|-----------------------------------|-----------|-----------|-----------|
| latitude     | longitude     | bulk soil                         | sand       | silt      | clay      | bulk soil                         | sand      | silt      | clay      |
| 42°13'24.02" | 87°22'37.83"  | 13.93±1.12                        | 4.32±0.50  | 6.96±0.87 | 1.47±0.21 | 0.52±0.08                         | 0.15±0.02 | 0.15±0.02 | 0.12±0.02 |
| 42°59'17.72" | 90°25'32.02"  | 15.71±0.79                        | 8.07±0.31  | 7.19±0.77 | 1.18±0.40 | 0.79±0.07                         | 0.37±0.02 | 0.17±0.02 | 0.08±0.02 |
| 43°16'04.17" | 91°15'35.87"  | 12.3±1.84                         | 6.29±0.53  | 4.47±1.37 | 1.23±0.42 | 1.32±0.79                         | 0.23±0.04 | 0.11±0.04 | 0.09±0.02 |
| 43°24'13.23" | 91°54'43.13"  | 13.43±1.63                        | 6.96±0.18  | 3.82±0.96 | 1.61±0.43 | 0.76±0.19                         | 0.28±0.03 | 0.15±0.05 | 0.15±0.05 |
| 43°07'38.09" | 92°48'45.88"  | 18.4±0.92                         | 8.37±0.51  | 5.72±0.46 | 3.40±0.37 | 0.92±0.14                         | 0.30±0.04 | 0.16±0.02 | 0.23±0.03 |
| 42°58'04.74" | 93°27'34.27"  | 9.85±0.74                         | 4.80±0.37  | 3.07±0.67 | 1.41±0.21 | 0.61±0.06                         | 0.34±0.05 | 0.14±0.03 | 0.13±0.02 |
| 42°41'55.57" | 93°58'53.51"  | 6.24±0.24                         | 2.46±0.17  | 2.82±0.47 | 1.04±0.18 | 0.59±0.24                         | 0.22±0.05 | 0.10±0.03 | 0.08±0.02 |
| 42°15'37.46" | 94°16'44.10"  | 21.16±3.70                        | 12.80±1.67 | 8.71±2.43 | 0.67±0.17 | 0.22±0.02                         | 0.21±0.02 | 0.08±0.01 | 0.05±0.01 |
| 41°34'12.85" | 95°17'50.04"  | 15.86±1.30                        | 6.67±0.73  | 7.60±0.33 | 2.08±0.36 | 0.54±0.03                         | 0.22±0.02 | 0.17±0.01 | 0.16±0.04 |
| 39°51'53.47" | 98°39'20.30"  | 22.19±1.33                        | 15.15±1.17 | 4.86±0.95 | 2.54±0.45 | 0.46±0.02                         | 0.17±0.04 | 0.08±0.00 | 0.16±0.01 |
| 40°14'41.91" | 99°20'35.82"  | 23.41±1.21                        | 20.91±0.57 | 2.82±0.97 | 0.34±0.04 | 0.33±0.04                         | 0.28±0.03 | 0.07±0.02 | 0.02±0.00 |
| 40°28'46.39" | 99°51'59.92"  | 12.61±0.29                        | 9.25±0.45  | 2.95±0.34 | 0.78±0.08 | 0.42±0.02                         | 0.23±0.04 | 0.05±0.01 | 0.08±0.01 |
| 41°08'18.31" | 100°27'38.72" | 13.21±0.85                        | 6.66±0.20  | 5.14±0.73 | 1.27±0.20 | 0.59±0.08                         | 0.22±0.02 | 0.11±0.02 | 0.11±0.02 |
| 41°39'47.22" | 100°58'30.60" | 14.39±0.55                        | 8.35±0.43  | 5.13±0.63 | 1.98±0.44 | 0.52±0.03                         | 0.23±0.01 | 0.09±0.01 | 0.12±0.02 |
| 42°00'49.37" | 101°42'23.12" | 10.55±0.44                        | 8.62±0.60  | 1.68±0.17 | 0.70±0.17 | 0.33±0.03                         | 0.25±0.03 | 0.08±0.01 | 0.09±0.02 |
| 41°57'49.08" | 102°20'41.89" | 6.45±0.36                         | 3.73±0.27  | 1.74±0.37 | 0.97±0.25 | 0.31±0.05                         | 0.28±0.02 | 0.04±0.01 | 0.09±0.01 |
| 41°43'02.80" | 103°06'51.38" | 14.99±0.39                        | 8.03±0.40  | 4.27±0.16 | 2.99±0.45 | 0.57±0.06                         | 0.26±0.03 | 0.11±0.01 | 0.20±0.03 |
| 41°21'26.33" | 103°45'42.79" | 6.86±0.37                         | 4.68±0.32  | 1.17±0.25 | 0.74±0.14 | 0.29±0.02                         | 0.27±0.03 | 0.03±0.01 | 0.08±0.01 |
| 40°52'33.64" | 104°26'49.14" | 14.6±0.84                         | 5.26±0.62  | 6.3±0.93  | 3.01±0.51 | 0.50±0.06                         | 0.20±0.02 | 0.18±0.02 | 0.19±0.03 |
| 40°47'37.30" | 104°52'51.45" | 9.14±1.64                         | 2.49±0.11  | 3.66±0.97 | 2.69±0.86 | 0.40±0.05                         | 0.20±0.03 | 0.10±0.02 | 0.18±0.06 |

---

|              |               |            |           |            |            |           |           |           |           |
|--------------|---------------|------------|-----------|------------|------------|-----------|-----------|-----------|-----------|
| 40°43'44.48" | 105°36'43.8"  | 7.22±0.86  | 3.65±0.61 | 1.85±0.31  | 1.23±0.17  | 0.35±0.05 | 0.30±0.04 | 0.09±0.02 | 0.14±0.02 |
| 40°41'025"   | 106°02'886"   | 9.97±1.77  | 2.14±0.11 | 4.68±0.54  | 3.96±0.59  | 0.59±0.10 | 0.23±0.04 | 0.24±0.03 | 0.26±0.03 |
| 41°27'02.23" | 107°00'06.04" | 19.94±3.4  | 1.21±0.19 | 7.69±1.25  | 9.72±1.89  | 1.19±0.13 | 0.18±0.02 | 0.47±0.05 | 0.57±0.06 |
| 41°47'46.44" | 107°28'11.62" | 10.19±0.49 | 0.88±0.17 | 4.24±0.25  | 3.96±0.41  | 0.93±0.03 | 0.21±0.03 | 0.40±0.03 | 0.36±0.02 |
| 41°49'42.97" | 107°36'40.26" | 10.17±0.64 | 0.77±0.04 | 3.75±0.25  | 4.15±0.36  | 1.03±0.08 | 0.20±0.03 | 0.42±0.04 | 0.46±0.04 |
| 41°51'57.84" | 108°03'14.43" | 7.71±0.33  | 1.27±0.12 | 2.69±0.17  | 2.79±0.20  | 0.76±0.07 | 0.23±0.03 | 0.26±0.03 | 0.37±0.03 |
| 41°54'52.38" | 108°42'38.69" | 10.8±0.60  | 1.17±0.04 | 4.14±0.22  | 4.36±0.30  | 1.28±0.09 | 0.23±0.03 | 0.53±0.02 | 0.61±0.03 |
| 42°09'46.07" | 109°09'56.15" | 8.48±0.43  | 0.96±0.08 | 2.88±0.20  | 3.83±0.29  | 0.94±0.07 | 0.18±0.03 | 0.31±0.02 | 0.47±0.03 |
| 42°24'54.72" | 109°48'18.06" | 7.01±0.43  | 0.60±0.03 | 2.93±0.20  | 2.58±0.26  | 1.13±0.08 | 0.24±0.03 | 0.44±0.03 | 0.49±0.05 |
| 42°37'26.24" | 110°17'41.72" | 6.89±0.54  | 0.89±0.04 | 2.62±0.34  | 2.51±0.30  | 0.90±0.05 | 0.30±0.03 | 0.30±0.03 | 0.38±0.02 |
| 42°55'54.74" | 110°49'27.19" | 4.79±0.17  | 0.56±0.04 | 1.79±0.15  | 1.82±0.11  | 0.75±0.06 | 0.25±0.04 | 0.26±0.02 | 0.32±0.02 |
| 43°08'49.69" | 111°21'18.26" | 8.56±0.90  | 0.78±0.06 | 3.16±0.35  | 3.33±0.35  | 0.99±0.08 | 0.22±0.01 | 0.41±0.04 | 0.51±0.03 |
| 43°22'54.51" | 111°57'51.32" | 14.27±0.32 | 1.03±0.05 | 5.86±0.14  | 6.20±0.29  | 1.07±0.02 | 0.17±0.01 | 0.43±0.01 | 0.56±0.01 |
| 43°38'05.12" | 112°11'47.03" | 4.36±0.40  | 0.65±0.06 | 1.07±0.22  | 1.72±0.07  | 0.58±0.06 | 0.21±0.02 | 0.15±0.02 | 0.26±0.01 |
| 43°42'25.70" | 112°55'16.72" | 9.04±1.03  | 0.60±0.04 | 3.51±0.55  | 3.80±0.48  | 1.04±0.02 | 0.18±0.01 | 0.40±0.02 | 0.48±0.02 |
| 43°49'08.29" | 113°27'58.82" | 6.38±0.49  | 0.98±0.06 | 2.32±0.17  | 2.11±0.15  | 0.75±0.06 | 0.20±0.02 | 0.29±0.02 | 0.33±0.02 |
| 43°50'58.62" | 114°05'08.22" | 9.90±0.43  | 1.11±0.09 | 3.68±0.31  | 3.83±0.15  | 1.38±0.04 | 0.24±0.01 | 0.48±0.04 | 0.59±0.02 |
| 43°58'46.01" | 114°49'36.29" | 15.63±2.46 | 1.27±0.29 | 6.75±0.83  | 6.67±1.08  | 1.89±0.11 | 0.20±0.03 | 0.79±0.08 | 0.86±0.05 |
| 43°55'33.55" | 115°42'06.75" | 13.57±1.03 | 1.08±0.12 | 5.80±0.48  | 5.72±0.45  | 1.78±0.13 | 0.20±0.01 | 0.71±0.05 | 0.80±0.06 |
| 44°13'17.46" | 116°30'25.43" | 16.52±0.23 | 1.03±0.09 | 8.23±0.34  | 6.59±0.11  | 1.97±0.02 | 0.23±0.01 | 0.92±0.03 | 0.84±0.01 |
| 44°27'59.70" | 117°10'47.04" | 21.04±2.11 | 2.13±0.18 | 9.97±0.92  | 8.68±0.97  | 2.39±0.24 | 0.24±0.02 | 1.08±0.09 | 1.08±0.10 |
| 44°39'58.27" | 117°53'44.73" | 29.75±1.29 | 2.99±0.35 | 13.4±0.59  | 12.4±0.37  | 3.15±0.10 | 0.32±0.03 | 1.39±0.06 | 1.49±0.05 |
| 44°59'23.89" | 118°44'44.89" | 20.49±1.39 | 3.71±0.43 | 9.19±0.97  | 5.88±0.40  | 2.10±0.14 | 0.34±0.04 | 0.94±0.09 | 0.69±0.05 |
| 45°25'36.47" | 119°43'23.02" | 30.44±1.56 | 4.04±0.74 | 13.76±0.63 | 9.60±0.41  | 2.84±0.11 | 0.32±0.04 | 1.21±0.05 | 1.01±0.04 |
| 46°22'37.77" | 120°28'38.48" | 43.06±3.25 | 7.51±1.38 | 20.66±1.56 | 15.36±1.04 | 3.89±0.28 | 0.57±0.09 | 1.57±0.12 | 1.55±0.10 |

---

---

|              |               |            |            |            |            |           |           |           |           |
|--------------|---------------|------------|------------|------------|------------|-----------|-----------|-----------|-----------|
| 47°39'21.62" | 119°17'57.40" | 35.76±2.28 | 5.08±0.61  | 17.15±1.8  | 13.91±0.51 | 3.27±0.22 | 0.38±0.05 | 1.46±0.19 | 1.42±0.05 |
| 48°05'19.80" | 118°27'20.04" | 23.41±0.74 | 2.10±0.26  | 11.3±0.44  | 9.08±0.23  | 2.39±0.06 | 0.22±0.03 | 1.06±0.05 | 1.03±0.02 |
| 48°20'40.36" | 117°58'46.17" | 14.95±0.96 | 1.37±0.15  | 5.97±0.35  | 6.55±0.34  | 1.65±0.11 | 0.28±0.04 | 0.59±0.03 | 0.79±0.03 |
| 48°29'493"   | 117°09'716"   | 10.57±0.27 | 1.52±0.11  | 4.06±0.21  | 4.16±0.12  | 1.33±0.03 | 0.29±0.03 | 0.41±0.01 | 0.51±0.01 |
| 48°51'26.99" | 116°53'36.00" | 13.74±1.39 | 1.18±0.17  | 5.40±0.50  | 6.87±0.72  | 1.71±0.14 | 0.20±0.03 | 0.54±0.05 | 0.84±0.08 |
| 49°20'17.60" | 117°05'28.24" | 18.24±2.04 | 3.26±0.50  | 8.90±1.26  | 5.93±0.42  | 2.01±0.20 | 0.38±0.08 | 0.82±0.12 | 0.69±0.04 |
| 49°31'45.39" | 118°00'35.84" | 14.16±0.36 | 1.70±0.08  | 6.32±0.17  | 4.76±0.15  | 1.62±0.01 | 0.24±0.03 | 0.59±0.01 | 0.55±0.02 |
| 49°47'01.88" | 118°32'00.47" | 19.20±0.85 | 3.34±0.39  | 9.61±0.39  | 5.92±0.26  | 2.17±0.09 | 0.40±0.05 | 0.89±0.02 | 0.70±0.03 |
| 50°03'13.52" | 119°16'57.97" | 27.15±1.47 | 3.60±0.15  | 15.22±0.91 | 9.36±0.42  | 2.78±0.11 | 0.34±0.01 | 1.33±0.07 | 1.01±0.04 |
| 49°52'44.41" | 119°59'36.93" | 46.16±0.99 | 8.78±1.07  | 20.36±1.1  | 15.55±0.86 | 4.11±0.05 | 0.65±0.09 | 1.63±0.07 | 1.51±0.09 |
| 49°28'48.71" | 119°40'55.44" | 45.30±2.88 | 11.18±3.47 | 14.51±1.25 | 16.01±1.37 | 4.28±0.27 | 0.94±0.33 | 1.24±0.10 | 1.63±0.13 |
| 49°11'195"   | 120°21'451"   | 38.73±4.35 | 5.01±0.80  | 21.52±2.63 | 11.63±0.94 | 3.64±0.39 | 0.47±0.06 | 1.90±0.23 | 1.19±0.09 |
| 44°46'16.79" | 123°23'04.99" | 15.35±0.71 | 1.90±0.38  | 4.96±1.05  | 8.50±0.63  | 1.46±0.22 | 0.30±0.04 | 0.48±0.11 | 0.76±0.08 |

---
