# Supplementary material for: Carbon and nitrogen stocks in particle-size fractions of topsoil along a 3000 km aridity gradient in northern China
Source: Copernicus journal article supplement (doi:10.5194/bg-2015-651), 2016-01-18
Supplement: Supplementary file [file bg-2015-651-AC2-supplement.pdf]

**Table 3** Results of the multiple regressions refer to the final accepted model which just included the effects of the significant variables for C stocks in bulk soils of arid and semi-arid grasslands

**Table 4** Results of the multiple regressions refer to the final accepted model which just included the effects of the significant variables for N stocks in bulk soils of arid and semi-arid grasslands

Table 3

| variables            | unstandardized coefficients |       | standardized coefficients | correlations |        |
|----------------------|-----------------------------|-------|---------------------------|--------------|--------|
|                      | B                           | SE    | Beta                      | partial      | part   |
| clay C concentration | 0.117                       | 0.005 | 0.696                     | 0.813        | 0.349  |
| clay content         | 0.305                       | 0.015 | 0.45                      | 0.776        | 0.307  |
| silt content         | 0.09                        | 0.01  | 0.206                     | 0.452        | 0.126  |
| silt C concentration | -0.034                      | 0.008 | -0.122                    | -0.258       | -0.067 |

Table 4

| variables            | unstandardized coefficients |       | standardized coefficients | correlations |        |
|----------------------|-----------------------------|-------|---------------------------|--------------|--------|
|                      | B                           | SE    | Beta                      | partial      | part   |
| BD                   | -0.246                      | 0.088 | -0.1                      | -0.164       | -0.042 |
| clay N concentration | 0.094                       | 0.003 | 0.61                      | 0.855        | 0.416  |
| clay content         | 0.02                        | 0.002 | 0.274                     | 0.43         | 0.12   |
| sand content         | -0.009                      | 0.001 | -0.302                    | -0.397       | -0.109 |
| sand N concentration | -0.033                      | 0.015 | -0.052                    | -0.124       | -0.031 |
